# Supplementary material for: Transcription Factor Lmx1b Negatively Regulates Osteoblast Differentiation and Bone Formation
Source: MDPI journal article supplement (doi:10.3390/ijms23095225), 2022-05-07
Supplement: s1 [file s1]

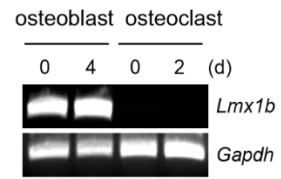

**Figure S1.** Expression of *Lmx1b* in osteoblasts and osteoclasts. Osteoblasts or osteoclasts were cultured in osteogenic medium or osteoclastogenic medium, respectively, for the indicated times. Expression of *Lmx1b* and *Gapdh* was determined using RT-PCR.

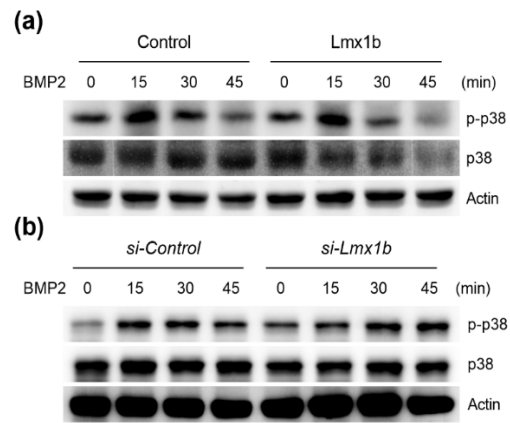

**Figure S2.** Lmx1b regulates the BMP2 signaling pathways in osteoblasts, with the exception of p38 MAPK activation. Lmx1b-overexpressing primary osteoblast precursor cells (a) or Lmx1b-silenced primary osteoblast precursor cells (b) were stimulated with BMP2 for the indicated time durations. Whole-cell lysates were subjected to western blot analysis with specific antibodies, as indicated.

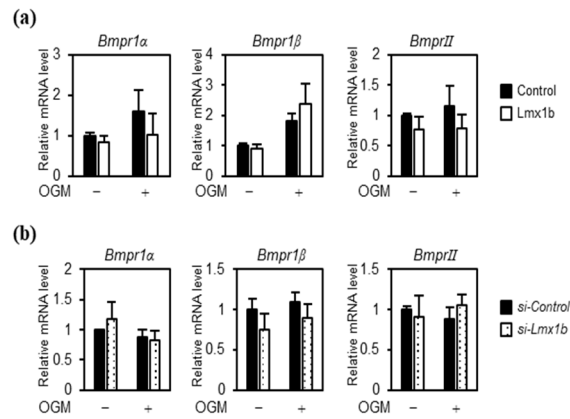

**Figure S3.** Lmx1b did not alter the expression levels of BMP receptors (BMPRs). Lmx1b-overexpressing primary osteoblast precursor cells (a) or Lmx1b-silenced primary osteoblast precursor cells (b) were cultured in osteogenic medium for 3 days. Total RNA was subjected to real-time PCR analysis of the expression of *Bmpr1α*, *Bmpr1β*, and *BmprII*.
